# Supplementary material
Source: publisher figshare collection journal article supplement (https://acs.figshare.com/ndownloader/files/4198237)
Supplement: Supplementary file 1 [file 4198237]

data_jac06

 

_audit_creation_method            SHELXL-97

_chemical_name_systematic

;

 ?

;

_chemical_name_common             ?

_chemical_melting_point           ?

_chemical_formula_moiety          'C18 H18 N2 O8, 0.5(C6 H6), H2 O'

_chemical_formula_sum

 'C21 H23 N2 O9'

_chemical_formula_weight          447.41

 

loop_

 _atom_type_symbol

 _atom_type_description

 _atom_type_scat_dispersion_real

 _atom_type_scat_dispersion_imag

 _atom_type_scat_source

 'C'  'C'   0.0033   0.0016

 'International Tables Vol C Tables 4.2.6.8 and 6.1.1.4'

 'H'  'H'   0.0000   0.0000

 'International Tables Vol C Tables 4.2.6.8 and 6.1.1.4'

 'N'  'N'   0.0061   0.0033

 'International Tables Vol C Tables 4.2.6.8 and 6.1.1.4'

 'O'  'O'   0.0106   0.0060

 'International Tables Vol C Tables 4.2.6.8 and 6.1.1.4'

 

_symmetry_cell_setting            Monoclinic

_symmetry_space_group_name_H-M    C2

 

loop_

 _symmetry_equiv_pos_as_xyz

 'x, y, z'

 '-x, y, -z'

 'x+1/2, y+1/2, z'

 '-x+1/2, y+1/2, -z'

 

_cell_length_a                    20.744(4)

_cell_length_b                    7.7389(15)

_cell_length_c                    12.557(3)

_cell_angle_alpha                 90.00

_cell_angle_beta                  97.41(3)

_cell_angle_gamma                 90.00

_cell_volume                      1999.0(7)

_cell_formula_units_Z             4

_cell_measurement_temperature     100(2)

_cell_measurement_reflns_used     ?

_cell_measurement_theta_min       ?

_cell_measurement_theta_max       ?

 

_exptl_crystal_description        Blade

_exptl_crystal_colour             Colorless

_exptl_crystal_size_max           0.39

_exptl_crystal_size_mid           0.16

_exptl_crystal_size_min           0.07

_exptl_crystal_density_meas       .

_exptl_crystal_density_diffrn     1.487

_exptl_crystal_density_method     'not measured'

_exptl_crystal_F_000              940

_exptl_absorpt_coefficient_mu     0.118

_exptl_absorpt_correction_type    multi-scan

_exptl_absorpt_correction_T_min   0.6457

_exptl_absorpt_correction_T_max   0.7461

_exptl_absorpt_process_details    'TWINABS v2008/4, Bruker-AXS, Madison, WI'

 

_exptl_special_details

;

 ------------------------------------------------------------------------------

 Cell for domain  1:   20.744    7.739   12.557    89.89    97.41    90.05

 Figure of merit: 0.600   %(0.1):  60.2   %(0.2):  69.1   %(0.3):  80.0

 Orientation matrix: -0.04445728  0.04818610  0.00282726
                      0.00560060 -0.01641988  0.07966854
                      0.01884941  0.11876798  0.00971092

 Percentages of reflections in this domain not consistent with lattice types:
 A: 54.8,  B: 54.8,  C:  0.0,  I: 54.5,  F: 54.8,  O: 68.9  and  R: 64.5%

 Percentages of reflections in this domain that do not have:
 h=2n: 49.0,  k=2n: 49.0,  l=2n: 54.5,  h=3n: 72.1,  k=3n: 67.4,  l=3n: 67.7%

 RLATT color-coding employed in file: jac06_a.p4p
 White: indexed for first domain
 Red: not yet indexed

   341 reflections within tolerance assigned to domain  1,
   341 of them exclusively;   109 reflections not yet assigned to a domain

 ------------------------------------------------------------------------------

 Cell for domain  2:   20.744    7.739   12.557    89.89    97.41    90.05

 Figure of merit: 0.802   %(0.1):  88.1   %(0.2):  97.2   %(0.3):  99.1

 Orientation matrix: -0.04497312 -0.04820941 -0.00367023
                     -0.00632593  0.01667577 -0.07965465
                      0.01733545 -0.11872289 -0.00954151

 Rotated from first domain by 180.0 degrees about
 reciprocal axis  1.000  0.000 -0.077  and real axis  1.000  0.002  0.003

 Twin law to convert hkl from first to      1.001   0.001   0.018
 this domain (SHELXL TWIN matrix):         -0.001  -1.000   0.001
                                           -0.150  -0.003  -1.001

 RLATT color-coding employed in file: jac06_b.p4p
 White: indexed for first domain
 Green: current domain (but not in a previous domain)
 Red: not yet indexed

   319 reflections within tolerance assigned to domain  2,
   107 of them exclusively;     2 reflections not yet assigned to a domain

 ------------------------------------------------------------------------------

 PART 1 - Refinement of parameters to model systematic errors

     4095 data (   1047 unique ) involve domain  1 only,  mean I/sigma   7.3
     4126 data (   1039 unique ) involve domain  2 only,  mean I/sigma   7.7
    12800 data (   2820 unique ) involve   2 domains,  mean I/sigma   7.0

 ------------------------------------------------------------------------------
;

 

_diffrn_ambient_temperature       100(2)

_diffrn_radiation_wavelength      0.71073

_diffrn_radiation_type            MoK\a

_diffrn_radiation_source          'fine-focus sealed tube'

_diffrn_radiation_monochromator   graphite

_diffrn_measurement_device_type   'Bruker KAPPA APEX II'

_diffrn_measurement_method        '\w scans; 8 settings'

_diffrn_detector_area_resol_mean  ?

_diffrn_reflns_number             4904

_diffrn_reflns_av_R_equivalents   0.0000

_diffrn_reflns_av_sigmaI/netI     0.0564

_diffrn_reflns_limit_h_min        -29

_diffrn_reflns_limit_h_max        29

_diffrn_reflns_limit_k_min        0

_diffrn_reflns_limit_k_max        11

_diffrn_reflns_limit_l_min        0

_diffrn_reflns_limit_l_max        17

_diffrn_reflns_theta_min          1.98

_diffrn_reflns_theta_max          30.52

_reflns_number_total              4905

_reflns_number_gt                 3856

_reflns_threshold_expression      >2sigma(I)

 

_computing_data_collection        'Bruker APEX2 v2009.7-0'

_computing_cell_refinement        'Bruker SAINT-Plus v7.68A'

_computing_data_reduction         'Bruker SAINT-Plus v7.68A'

_computing_structure_solution     'SHELXS-97 (Sheldrick, 2008)'

_computing_structure_refinement   'SHELXL-97 (Sheldrick, 2008)'

_computing_molecular_graphics     'Bruker XP v5.1'

_computing_publication_material   'Bruker XCIF 2008'

 

_refine_special_details

;

 Refinement of F^2^ against ALL reflections.  The weighted R-factor wR and

 goodness of fit S are based on F^2^, conventional R-factors R are based

 on F, with F set to zero for negative F^2^. The threshold expression of

 F^2^ > 2sigma(F^2^) is used only for calculating R-factors(gt) etc. and is

 not relevant to the choice of reflections for refinement.  R-factors based

 on F^2^ are statistically about twice as large as those based on F, and R-

 factors based on ALL data will be even larger.

;

 

_refine_ls_structure_factor_coef  Fsqd 
_refine_ls_matrix_type            'Full matrix' 
_refine_ls_weighting_scheme       Sigma
_refine_ls_weighting_details      'w=1/s^2^(Fo^2^)' 
_atom_sites_solution_primary      'Direct methods'
_atom_sites_solution_secondary    'Difference Fourier map'
_atom_sites_solution_hydrogens    'Geometric positions'
_refine_ls_hydrogen_treatment     Riding 
_chemical_absolute_configuration  unk
_refine_ls_extinction_method      none

_refine_ls_extinction_coef        ?

_refine_ls_abs_structure_details

 'Flack H D (1983), Acta Cryst. A39, 876-881'

_refine_ls_abs_structure_Flack    0.0(15)

_refine_ls_number_reflns          4905

_refine_ls_number_parameters      295

_refine_ls_number_restraints      1

_refine_ls_R_factor_all           0.0724

_refine_ls_R_factor_gt            0.0475

_refine_ls_wR_factor_ref          0.0586

_refine_ls_wR_factor_gt           0.0570

_refine_ls_goodness_of_fit_ref    2.523

_refine_ls_restrained_S_all       2.522

_refine_ls_shift/su_max           0.003

_refine_ls_shift/su_mean          0.000

 

loop_

 _atom_site_label

 _atom_site_type_symbol

 _atom_site_fract_x

 _atom_site_fract_y

 _atom_site_fract_z

 _atom_site_U_iso_or_equiv

 _atom_site_adp_type

 _atom_site_occupancy

 _atom_site_symmetry_multiplicity

 _atom_site_calc_flag

 _atom_site_refinement_flags

 _atom_site_disorder_assembly

 _atom_site_disorder_group

O1 O 0.85526(14) 0.4178(3) 0.4236(2) 0.0206(7) Uani 1 1 d . . .

O2 O 0.93248(12) 0.5646(3) 0.1137(2) 0.0151(7) Uani 1 1 d . . .

H2 H 0.9005 0.6248 0.0881 0.023 Uiso 1 1 calc R . .

O3 O 0.82153(14) 0.4557(4) -0.0488(2) 0.0148(8) Uani 1 1 d . . .

O4 O 0.90858(11) 0.2056(3) -0.1515(2) 0.0150(7) Uani 1 1 d . . .

H4 H 0.9375 0.2277 -0.1001 0.022 Uiso 1 1 calc R . .

O5 O 0.79241(16) -0.1604(3) -0.4248(2) 0.0210(8) Uani 1 1 d . . .

O6 O 0.91322(12) -0.3189(3) -0.1136(2) 0.0145(7) Uani 1 1 d . . .

H6 H 0.8881 -0.3959 -0.0961 0.022 Uiso 1 1 calc R . .

O7 O 0.83111(13) -0.2039(4) 0.0519(2) 0.0155(8) Uani 1 1 d . . .

O8 O 0.93456(12) 0.0470(3) 0.1510(2) 0.0160(7) Uani 1 1 d . . .

H8 H 0.9524 -0.0024 0.1029 0.024 Uiso 1 1 calc R . .

N1 N 0.85560(14) 0.2544(4) 0.0781(3) 0.0104(8) Uani 1 1 d . . .

N2 N 0.84415(14) -0.0047(4) -0.0763(3) 0.0108(8) Uani 1 1 d . . .

C1 C 0.88318(18) 0.5634(6) 0.3838(3) 0.0209(10) Uani 1 1 d . . .

H1 H 0.8830 0.6624 0.4285 0.025 Uiso 1 1 calc R . .

C2 C 0.90969(17) 0.5893(5) 0.2959(3) 0.0183(10) Uani 1 1 d . . .

H2A H 0.9277 0.7011 0.2893 0.022 Uiso 1 1 calc R . .

C3 C 0.91597(18) 0.4676(5) 0.2034(3) 0.0151(9) Uani 1 1 d . . .

H3 H 0.9515 0.3830 0.2259 0.018 Uiso 1 1 calc R . .

C4 C 0.8514(2) 0.3673(6) 0.1726(3) 0.0147(10) Uani 1 1 d . . .

H4A H 0.8139 0.4489 0.1584 0.018 Uiso 1 1 calc R . .

C5 C 0.84101(17) 0.2421(5) 0.2610(3) 0.0135(10) Uani 1 1 d . . .

C6 C 0.84617(17) 0.2676(6) 0.3657(3) 0.0172(10) Uani 1 1 d . . .

H6A H 0.8431 0.1662 0.4074 0.021 Uiso 1 1 calc R . .

C7 C 0.8399(2) 0.3089(7) -0.0234(4) 0.0136(13) Uani 1 1 d . . .

C8 C 0.84870(18) 0.1779(5) -0.1118(3) 0.0137(9) Uani 1 1 d . . .

C9 C 0.79489(18) 0.1845(5) -0.2059(3) 0.0147(9) Uani 1 1 d . . .

H9A H 0.8024 0.2788 -0.2561 0.018 Uiso 1 1 calc R . .

H9B H 0.7519 0.2009 -0.1810 0.018 Uiso 1 1 calc R . .

C10 C 0.79942(18) 0.0094(5) -0.2581(3) 0.0135(9) Uani 1 1 d . . .

C11 C 0.79031(18) -0.0121(6) -0.3625(3) 0.0194(11) Uani 1 1 d . . .

H11 H 0.7806 0.0910 -0.4025 0.023 Uiso 1 1 calc R . .

C12 C 0.81888(19) -0.3099(6) -0.3834(3) 0.0199(11) Uani 1 1 d . . .

H12 H 0.8076 -0.4088 -0.4267 0.024 Uiso 1 1 calc R . .

C13 C 0.85774(17) -0.3429(5) -0.2933(3) 0.0189(10) Uani 1 1 d . . .

H13 H 0.8728 -0.4586 -0.2849 0.023 Uiso 1 1 calc R . .

C14 C 0.88125(18) -0.2223(5) -0.2026(3) 0.0145(9) Uani 1 1 d . . .

H14 H 0.9133 -0.1401 -0.2277 0.017 Uiso 1 1 calc R . .

C15 C 0.8243(2) -0.1186(6) -0.1697(3) 0.0111(10) Uani 1 1 d . . .

H15 H 0.7886 -0.1978 -0.1543 0.013 Uiso 1 1 calc R . .

C16 C 0.8442(2) -0.0553(7) 0.0253(4) 0.0128(13) Uani 1 1 d . . .

C17 C 0.86793(18) 0.0731(5) 0.1142(3) 0.0120(9) Uani 1 1 d . . .

C18 C 0.83000(17) 0.0625(5) 0.2108(3) 0.0144(9) Uani 1 1 d . . .

H18A H 0.7832 0.0406 0.1879 0.017 Uiso 1 1 calc R . .

H18B H 0.8475 -0.0291 0.2615 0.017 Uiso 1 1 calc R . .

O21 O 0.0000 0.3462(6) 0.0000 0.0166(14) Uani 1 2 d S . .

H21A H 0.0226 0.4462 -0.0219 0.050 Uiso 1 1 d . . .

O22 O 1.0000 0.8951(5) 1.0000 0.0148(13) Uani 1 2 d S . .

H22A H 0.9827 0.8142 0.9612 0.050 Uiso 1 1 d . . .

C21 C 0.98646(19) 0.2553(5) 0.5484(3) 0.0345(11) Uani 1 1 d . . .

H21 H 0.9784 0.3619 0.5818 0.041 Uiso 1 1 calc R . .

C22 C 0.9715(2) 0.1029(6) 0.5951(3) 0.0390(11) Uani 1 1 d . . .

H22 H 0.9520 0.1038 0.6595 0.047 Uiso 1 1 calc R . .

C23 C 0.9852(2) -0.0546(5) 0.5471(3) 0.0451(13) Uani 1 1 d . . .

H23 H 0.9746 -0.1608 0.5785 0.054 Uiso 1 1 calc R . .

 

loop_

 _atom_site_aniso_label

 _atom_site_aniso_U_11

 _atom_site_aniso_U_22

 _atom_site_aniso_U_33

 _atom_site_aniso_U_23

 _atom_site_aniso_U_13

 _atom_site_aniso_U_12

O1 0.0251(17) 0.0240(19) 0.0131(15) -0.0080(14) 0.0042(14) -0.0006(14)

O2 0.0143(15) 0.0152(17) 0.0156(17) 0.0009(13) 0.0012(13) -0.0001(15)

O3 0.0190(18) 0.0078(18) 0.0164(19) 0.0026(14) -0.0025(14) 0.0013(14)

O4 0.0136(15) 0.0179(17) 0.0135(16) -0.0008(13) 0.0022(13) -0.0034(14)

O5 0.0286(16) 0.019(2) 0.0141(14) -0.0062(13) -0.0005(16) 0.0069(16)

O6 0.0151(15) 0.0094(16) 0.0191(18) -0.0010(12) 0.0023(13) -0.0017(15)

O7 0.0178(18) 0.0104(18) 0.018(2) -0.0022(14) 0.0035(15) -0.0028(14)

O8 0.0134(15) 0.0179(17) 0.0156(17) 0.0005(13) -0.0020(13) 0.0040(13)

N1 0.016(2) 0.0029(18) 0.014(2) -0.0010(16) 0.0054(16) 0.0002(15)

N2 0.014(2) 0.0075(19) 0.011(2) -0.0035(16) 0.0030(16) 0.0010(15)

C1 0.023(2) 0.015(3) 0.023(3) -0.006(2) -0.001(2) -0.002(2)

C2 0.023(2) 0.013(2) 0.019(2) -0.0077(19) 0.0024(19) -0.007(2)

C3 0.014(2) 0.018(2) 0.014(2) 0.0001(19) 0.0040(18) -0.004(2)

C4 0.020(3) 0.012(2) 0.013(2) -0.004(2) 0.006(2) 0.000(2)

C5 0.013(2) 0.011(2) 0.017(2) -0.0015(19) 0.0034(18) 0.0008(17)

C6 0.017(2) 0.011(2) 0.024(3) 0.001(2) 0.005(2) 0.000(2)

C7 0.010(2) 0.013(3) 0.017(3) -0.012(2) 0.002(2) -0.004(2)

C8 0.014(2) 0.015(3) 0.013(2) 0.005(2) 0.0018(18) -0.002(2)

C9 0.019(2) 0.012(2) 0.013(2) 0.000(2) 0.0002(18) -0.0029(19)

C10 0.012(2) 0.012(2) 0.016(2) 0.0011(18) 0.0016(18) -0.0010(17)

C11 0.021(2) 0.019(3) 0.017(3) -0.002(2) -0.001(2) -0.004(2)

C12 0.022(2) 0.018(3) 0.019(3) -0.009(2) 0.002(2) -0.005(2)

C13 0.022(2) 0.019(3) 0.017(2) -0.0042(18) 0.008(2) 0.000(2)

C14 0.017(2) 0.014(2) 0.012(2) 0.0005(18) 0.0024(18) 0.000(2)

C15 0.007(2) 0.013(2) 0.0135(19) -0.001(2) 0.000(2) -0.0013(19)

C16 0.009(2) 0.019(3) 0.011(3) 0.007(2) 0.004(2) 0.009(2)

C17 0.019(2) 0.005(2) 0.013(2) 0.003(2) 0.0036(18) -0.001(2)

C18 0.018(2) 0.013(2) 0.012(2) -0.0004(19) 0.0052(18) -0.0040(19)

O21 0.010(3) 0.010(3) 0.028(3) 0.000 -0.002(2) 0.000

O22 0.019(3) 0.012(3) 0.013(3) 0.000 0.001(2) 0.000

C21 0.028(2) 0.041(3) 0.032(3) -0.006(2) -0.008(2) 0.005(2)

C22 0.032(2) 0.057(3) 0.028(2) 0.008(3) 0.001(3) -0.004(3)

C23 0.055(3) 0.035(3) 0.041(3) 0.009(2) -0.010(3) -0.002(3)

 

_geom_special_details

;

 All esds (except the esd in the dihedral angle between two l.s. planes)

 are estimated using the full covariance matrix.  The cell esds are taken

 into account individually in the estimation of esds in distances, angles

 and torsion angles; correlations between esds in cell parameters are only

 used when they are defined by crystal symmetry.  An approximate (isotropic)

 treatment of cell esds is used for estimating esds involving l.s. planes.

;

 

loop_

 _geom_bond_atom_site_label_1

 _geom_bond_atom_site_label_2

 _geom_bond_distance

 _geom_bond_site_symmetry_2

 _geom_bond_publ_flag

O1 C1 1.389(5) . ?

O1 C6 1.371(5) . ?

O2 C3 1.432(4) . ?

O3 C7 1.227(5) . ?

O4 C8 1.413(4) . ?

O5 C11 1.393(5) . ?

O5 C12 1.355(5) . ?

O6 C14 1.434(4) . ?

O7 C16 1.238(5) . ?

O8 C17 1.414(4) . ?

N1 C7 1.342(6) . ?

N1 C4 1.485(5) . ?

N1 C17 1.486(5) . ?

N2 C16 1.334(6) . ?

N2 C8 1.489(5) . ?

N2 C15 1.483(5) . ?

C1 C2 1.310(5) . ?

C2 C3 1.514(5) . ?

C3 C4 1.553(5) . ?

C4 C5 1.510(5) . ?

C5 C6 1.320(5) . ?

C5 C18 1.531(5) . ?

C7 C8 1.531(6) . ?

C8 C9 1.518(5) . ?

C9 C10 1.514(5) . ?

C10 C11 1.311(5) . ?

C10 C15 1.527(6) . ?

C12 C13 1.327(5) . ?

C13 C14 1.505(5) . ?

C14 C15 1.528(5) . ?

C16 C17 1.528(6) . ?

C17 C18 1.531(5) . ?

C21 C21 1.403(8) 2_756 ?

C21 C22 1.371(6) . ?

C22 C23 1.405(6) . ?

C23 C23 1.401(9) 2_756 ?

 

loop_

 _geom_angle_atom_site_label_1

 _geom_angle_atom_site_label_2

 _geom_angle_atom_site_label_3

 _geom_angle

 _geom_angle_site_symmetry_1

 _geom_angle_site_symmetry_3

 _geom_angle_publ_flag

C1 O1 C6 122.1(3) . . ?

C11 O5 C12 121.9(3) . . ?

C7 N1 C4 122.8(4) . . ?

C7 N1 C17 126.7(4) . . ?

C4 N1 C17 109.7(3) . . ?

C16 N2 C8 125.0(4) . . ?

C16 N2 C15 123.2(4) . . ?

C8 N2 C15 110.4(3) . . ?

C2 C1 O1 131.9(4) . . ?

C1 C2 C3 129.7(4) . . ?

O2 C3 C2 109.3(3) . . ?

O2 C3 C4 110.6(3) . . ?

C2 C3 C4 110.2(3) . . ?

N1 C4 C5 103.8(3) . . ?

N1 C4 C3 110.9(3) . . ?

C5 C4 C3 109.8(3) . . ?

C6 C5 C18 122.3(4) . . ?

C6 C5 C4 129.5(4) . . ?

C18 C5 C4 107.9(3) . . ?

C5 C6 O1 130.0(4) . . ?

O3 C7 N1 124.5(5) . . ?

O3 C7 C8 119.1(5) . . ?

N1 C7 C8 116.3(5) . . ?

O4 C8 N2 110.0(3) . . ?

O4 C8 C9 108.2(3) . . ?

N2 C8 C9 101.3(3) . . ?

O4 C8 C7 110.3(4) . . ?

N2 C8 C7 113.2(4) . . ?

C9 C8 C7 113.5(4) . . ?

C8 C9 C10 103.1(4) . . ?

C11 C10 C9 122.5(4) . . ?

C11 C10 C15 129.5(4) . . ?

C9 C10 C15 107.5(3) . . ?

C10 C11 O5 130.9(4) . . ?

C13 C12 O5 131.5(4) . . ?

C12 C13 C14 129.0(4) . . ?

O6 C14 C13 109.8(3) . . ?

O6 C14 C15 111.1(3) . . ?

C13 C14 C15 110.1(3) . . ?

N2 C15 C14 112.4(3) . . ?

N2 C15 C10 102.9(3) . . ?

C14 C15 C10 110.2(3) . . ?

O7 C16 N2 123.9(5) . . ?

O7 C16 C17 117.9(4) . . ?

N2 C16 C17 117.9(4) . . ?

O8 C17 N1 110.9(3) . . ?

O8 C17 C18 108.3(3) . . ?

N1 C17 C18 101.9(3) . . ?

O8 C17 C16 110.8(3) . . ?

N1 C17 C16 111.4(3) . . ?

C18 C17 C16 113.2(3) . . ?

C5 C18 C17 102.3(3) . . ?

C21 C21 C22 120.6(3) 2_756 . ?

C23 C22 C21 119.5(4) . . ?

C23 C23 C22 119.8(3) 2_756 . ?

 

loop_

 _geom_hbond_atom_site_label_D

 _geom_hbond_atom_site_label_H

 _geom_hbond_atom_site_label_A

 _geom_hbond_distance_DH

 _geom_hbond_distance_HA

 _geom_hbond_distance_DA

 _geom_hbond_angle_DHA

 _geom_hbond_site_symmetry_A

O2 H2 O7  0.84 1.97 2.795(4) 168.8 1_565

O4 H4 O21  0.84 1.92 2.733(3) 162.9 1_655

O6 H6 O3  0.84 1.95 2.779(4) 171.0 1_545

O6 H6 O2  0.84 2.69 2.970(3) 101.0 1_545

O8 H8 O22  0.84 1.90 2.736(3) 174.8 1_544

O21 H21A O2  0.96 1.82 2.715(4) 153.3 2_655

O22 H22A O6  0.84 1.92 2.712(4) 156.7 1_566

 

_diffrn_measured_fraction_theta_max    0.986

_diffrn_reflns_theta_full              30.52

_diffrn_measured_fraction_theta_full   0.986

_refine_diff_density_max    0.360

_refine_diff_density_min   -0.387

_refine_diff_density_rms    0.070
